# Supplementary material for: Temperature-dependent yield stress and wall slip behaviour of thermoresponsive Pluronic F127 hydrogels
Source: Royal Society of Chemistry journal article supplement (doi:10.1039/d4ra04825c), 2024-01-01
Supplement: d4ra04825c1.pdf [file d4ra04825c1.pdf]

## Supplementary Information

### Temperature-dependent yield stress and wall slip behaviour of thermoresponsive Pluronic F127 hydrogels

Surya Narayana Sangitra and Ravi Kumar Pujala\*

*Soft and Active Matter group, Department of Physics, Indian Institute of Science Education and Research (IISER) Tirupati Yerpedu, Tirupati - 517619, Andhra Pradesh, India.*

*Corresponding author's E-mail address: [pujalaravikumar@iisertirupati.ac.in](mailto:pujalaravikumar@iisertirupati.ac.in)*

#### S1. Flow curves of PF127 solutions at different temperatures

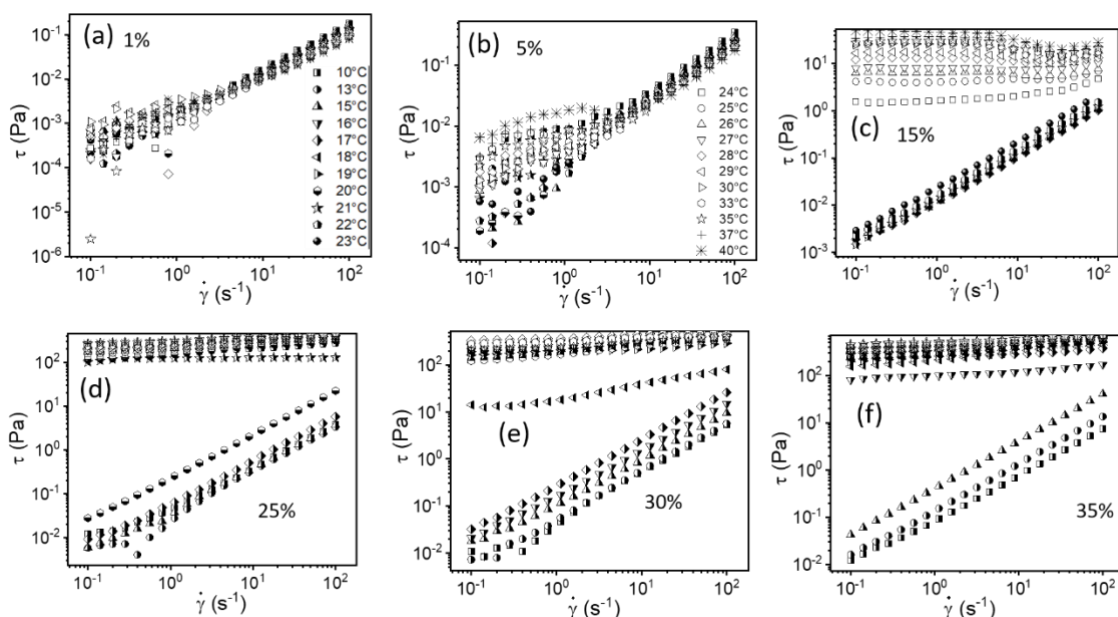

**Figure S1.** (a)-(f) Flow curves of PF127 at different temperatures varying from 20 °C to 30 °C with 1 °C intervals for 1%, 5%, 15%, 25%, 30% and 35%, respectively.

The flow curves, i.e. Shear stress ( $\tau$ ) Vs. Shear rate ( $\dot{\gamma}$ ), for different concentrations at different temperatures is shown in Figure S1. One can observe the yield stress behavior after 15% PF127; the transition temperature decreases as a function of concentrations. As per observation, for 15%, the  $T_{SG}$  is 24 °C, and for 20%, 25%, 30%, and 35% are, 23 °C, 21 °C, 18 °C and 16 °C, respectively.

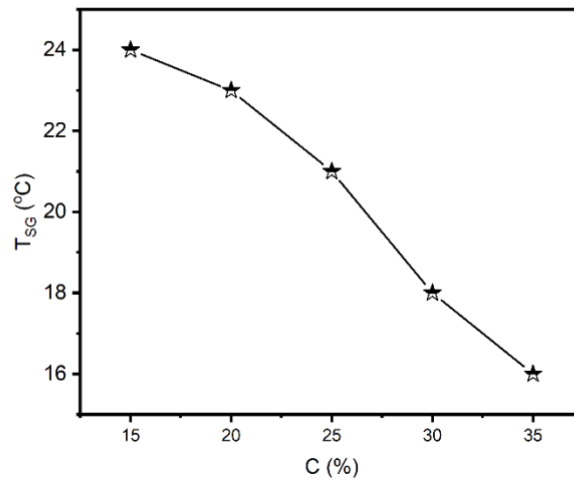

**Figure S2:** Sol-gel transition temperature (T<sub>SG</sub>) is plotted as a function of different concentrations(C %(w/v)) of PF127.

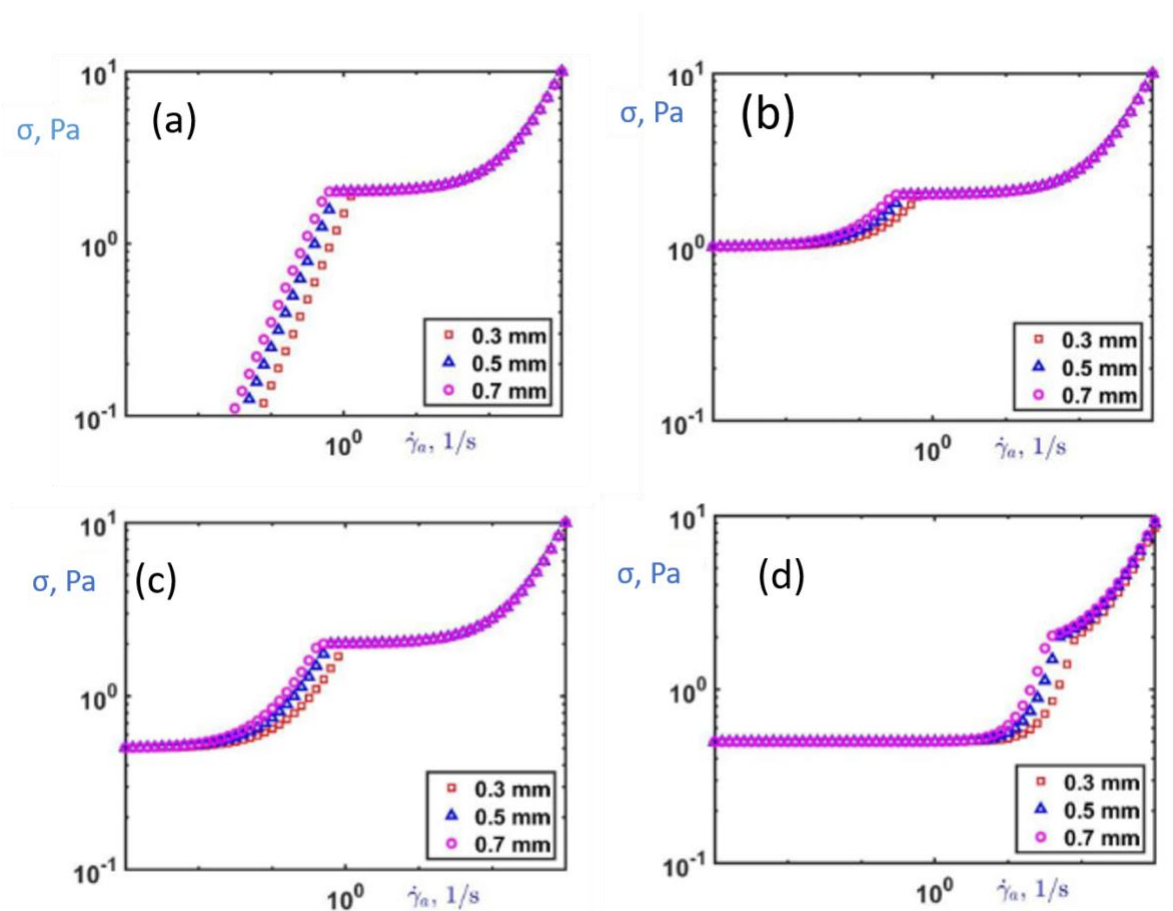

**Figure S3:** shows (a) and (b) represents flow curves (shear stress ( $\sigma$ ) vs. shear rate ( $\dot{\gamma}$ )) generated numerically for HB fluids in case of with the yield stress ( $\sigma_y$ ) = 2Pa, slip exponent ( $s$ ) = 1, and slip-coefficient ( $\beta$ ) =  $1 \cdot 10^4$  Pa $\cdot$ s/m $^s$ , flow index ( $n$ ) = 1, and consistency index ( $k$ ) =

$8 \cdot 10^{-3} \text{Pa} \cdot \text{s}^n$  for different the slip yield stress  $\sigma_s = 0$  and  $\sigma_s = 1 \text{Pa}$  respectively and (c) and (d) shows variation on the flow curve with  $\sigma_s = 0.5 \text{Pa}$ ,  $\sigma_y = 2 \text{Pa}$ ,  $\beta = 1 \cdot 10^4 \text{Pa} \cdot \text{s}^s / \text{m}^s$ ,  $n = 1$  and  $k = 8 \cdot 10^3 \text{Pa} \cdot \text{s}^n$ : with different slip exponents  $s = 1$  and  $s = 2$ , respectively. The Figures are adapted and reproduced with permission from Ref.<sup>47</sup>.

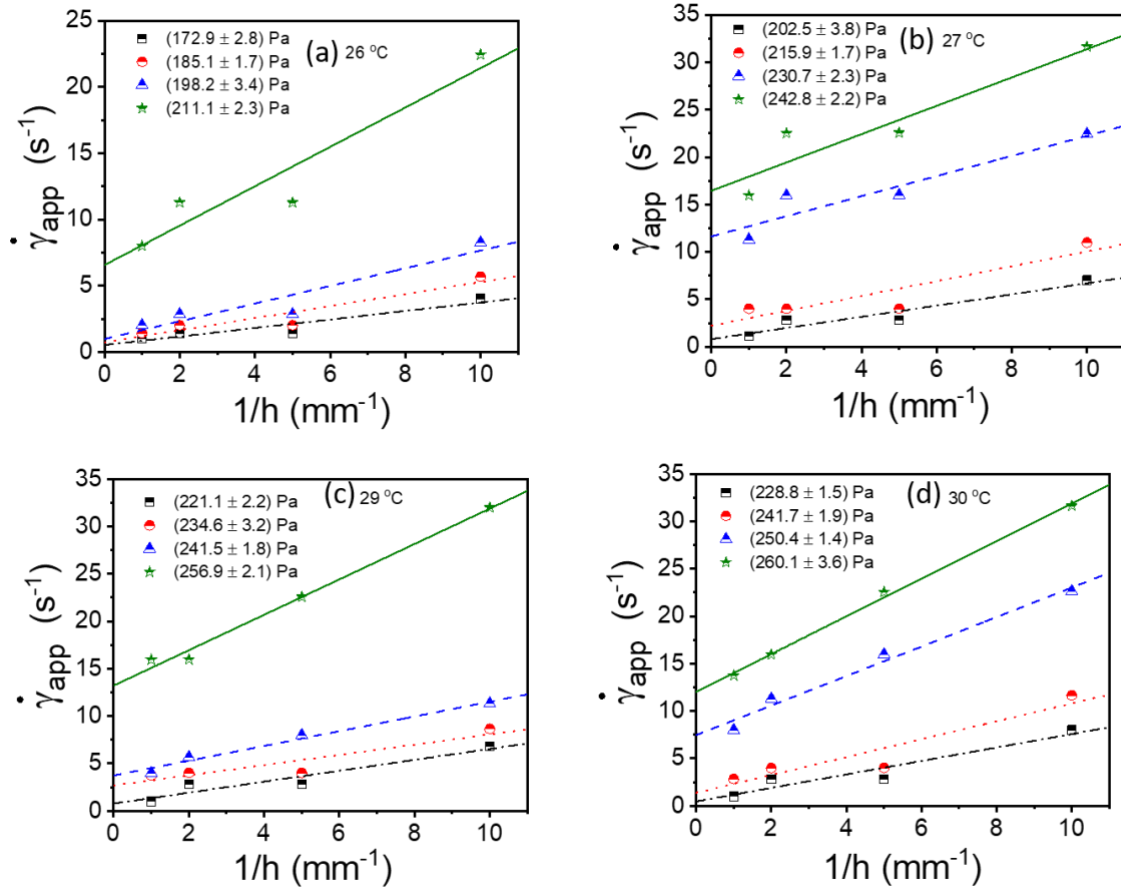

**Figure S4:** (a)-(d) represents Mooney's plots for PP-40 geometries between apparent shear ( $\dot{\gamma}_{app}$ ) rate and reciprocal of the gap between two parallel plates ( $1/h$ ) for different shear stress at different temperatures from 26 °C – 30 °C, respectively.

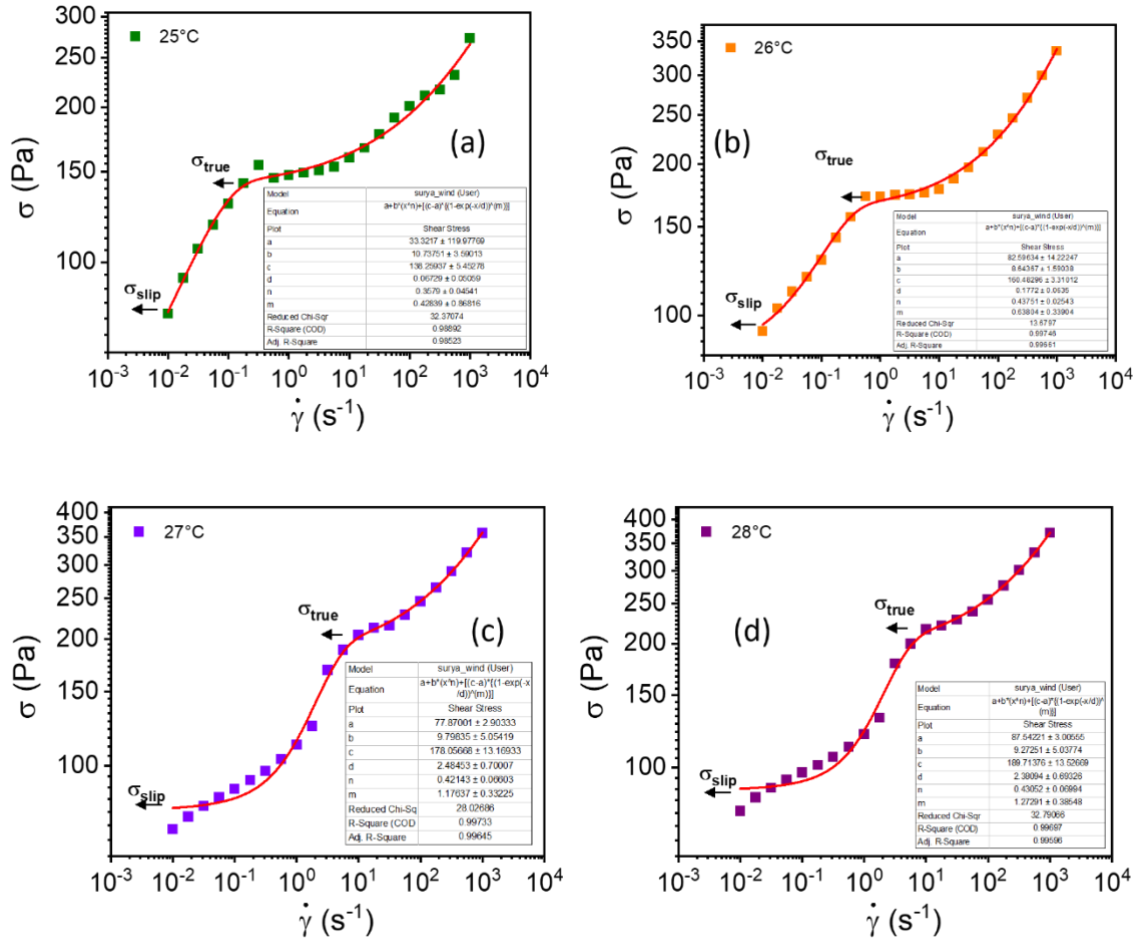

**Figure S5:** (a)-(d) represents the Windhab model (equation 15) fitting with flow curve data for 20% PF127 at temperatures at temperatures varying from 25 °C – 28 °C, respectively (for data set, 0.01 to 1000  $s^{-1}$ ).
